# Supplementary material
Source: Elsevier journal article supplement (https://www.sciencedirect.com/science/article/pii/S0213911118302486)
Supplement: mmc1 [file S0213911118302486:mmc1.docx]

**Apéndice**

**Tabla I**

Estudios incluidos en la revisión de desigualdades sociales en salud en población mayor en España

| **Indicador socioeconómico** | **Indicador de salud** | | | **Primer autor** | **Año** | | **Región** | **Población/muestra** | | | **Categorización del indicador socioeconómico** | |
| --- | --- | --- | --- | --- | --- | --- | --- | --- | --- | --- | --- | --- |
| ***Individual*** |  | | |  |  | |  |  | | |  | |
| **Nivel educativo (n = 73)** | | | |  |  |  | | |  |  | |
|  | **Estado funcional (n = 26)** | | |  |  | |  |  | | |  | |
|  |  | **Discapacidad (n = 15)** | |  |  | |  |  | | |  | |
|  |  | Discapacidad en ABVD | | Abellán68 | 2015 | | España | 3.970 personas residentes en la comunidad  (70,9% mujeres) | | | Bajo (hasta educación primaria completada); alto (educación secundaria o superior). | |
|  |  | Discapacidad | | Cámara70 | 2015 | | España | 13.661 personas residentes en la comunidad (62,2% mujeres) | | | Sin estudios; estudios primarios; estudios secundarios; estudios terciarios. | |
|  |  | Discapacidad | | Costa-Font33 | 2008 | | 16 comunidades autónomas | 729 personas | | | Sin educación formal; educación primaria completa; educación secundaria completa o superior. Se agrupan en dos categorías para el análisis: analfabetismo y algún grado de alfabetización. | |
|  |  | Discapacidad | | Espelt41 | 2010 | | Barcelona | Personas residentes en la comunidad: 893 en 1992, 2.140 en 2000 y 1.211 en 2006 | | | ISCED 1 (sin educación formal); ISCED 2 (estudios primarios); ISCED 3 (más que estudios primarios). | |
|  |  | Discapacidad | | Graciani22 | 2004 | | España (420 secciones censales) | 3.872 personas residentes en la comunidad | | | Analfabetx; menos que estudios primarios; estudios primarios; más que estudios primarios. | |
|  |  | Reducción en AD  Limitación en AD por problema de salud físico o mental, enfermedad o discapacidad | | Huisman19 | 2003 | | España, Bélgica, Francia, Alemania, Gran Bretaña, Grecia, Irlanda, Italia, Holanda y Portugal | 4.767 personas residentes en la comunidad (56,3% mujeres) | | | Menos que segunda fase de educación secundaria; segunda fase de educación secundaria; educación de tercer nivel reconocida. | |
|  |  | Vivir confinado/a en casa  Discapacidad | | Negrón-Blanco77 | 2016 | | Cinco Villas y  Zaragoza | 1.622 personas residentes en la comunidad (56,7% mujeres) | | | Menos que educación primaria; educación primaria; educación secundaria o superior. | |
|  |  | Discapacidad en ABVD  Discapacidad en AIVD  Discapacidad en la movilidad | | Palacios-Ceña56 | 2012 | | España | 18.325 personas residentes en la comunidad (61,9% mujeres) | | | Sin estudios; educación primaria completa; educación secundaria completa o superior. | |
|  |  | Cambio en la discapacidad funcional | | Rodriguez93 | 2014 | | España | 699 personas residentes en la comunidad (55,9% mujeres) | | | Sin estudios (sin educación formal, sin diferenciar entre analfabetxs o no); bajo (educación primaria); educación media/alta (estudios secundarios/universitarios). | |
|  |  | Discapacidad (dificultad para realizar 12 ABVD y AIVD) | | Rodriguez-Laso66 | 2014 | | España | 697 personas residentes en la comunidad(56% mujeres) | | | Menos que estudios primarios; estudios primarios completos; estudios secundarios completos; estudios universitarios. | |
|  |  | Discapacidad | | Sagardui-Villamor24 | 2005 | | España | Año 1986: 2.073.453 personas (63,8%)  Año 1999: 1.593.132 personas (67,1% mujeres)  Residentes en la comunidad e institucionalizadas durante menos de 1 año en residencia de ancianos/as o clínica | | | Analfabetx o sin educación formal; educación primaria; educación secundaria o superior. | |
|  |  | Discapacidad en AD | | Sanchez-Santos88 | 2011 | | Leganés (Madrid) | 1.016 personas residentes en la comunidad (49,5% mujeres),  615 defunciones (42,8% mujeres) | | | Analfabeto/a; estudios primarios incompletos; estudios primarios completes. Se agrupan en dos categorías para el análisis: analfabetismo y alguna educación. | |
|  |  | ABVD  AIVD | | Vergara94 | 2014 | | País Vasco | 557 personas que acuden a urgencias por una fractura de cadera debido a una caída (84,4% mujeres) | | | Analfabetx; lee y escribe; educación primaria; educación secundaria; educación universitaria. | |
|  |  | ABVD  AIVD | | Vergara96 | 2016 | | País Vasco | 680 personas que acuden a urgencias por fractura de muñeca debido a una caída accidental (88,7% mujeres) | | | Analfabetx; lee y escribe; educación primaria; educación secundaria; educación universitaria. | |
|  |  | Discapacidad en las AD  Limitación funcional | | Zunzunegui85 | 2006 | | Leganés (Madrid) | 2.283 personas residentes en la comunidad (27,8% mujeres) | | | Al menos educación primaria; menos que educación primaria. | |
|  |  | **Fragilidad (n = 6)** | |  |  | |  |  | | |  | |
|  |  | Fragilidad: limitación de EPOC en las AD | | Álvarez-Gutiérrez30 | 2007 | | España | 1.057 pacientes con EPOC (4,6% mujeres) | | | No saber leer o escribir; estudios primarios incompletos; estudios primarios completos; estudios secundarios; estudios superiores. | |
|  |  | Fragilidad | | Castell40 | 2010 | | Barrio de Peñagrande (Madrid) | 814 personas (51,4% mujeres) | | | Menor que educación primaria; educación primaria o superior. | |
|  |  | Síndrome de fragilidad | | Garcia-Garcia46 | 2011 | | Provincia de Toledo | 2.488 personas (56,1% mujeres)  1,9% institucionalizadas | | | Sin escolarización formal; estudios no completados; estudios primarios o secundarios; bachiller y superiores. | |
|  |  | Fragilidad | | Jürschik47 | 2011 | | Lleida ciudad | 323 personas con tarjeta sanitaria y residentes en viviendas familiares (57,6% mujeres) | | | Con estudios; sin estudios. | |
|  |  | Fragilidad | | Santos-Eggimann39 | 2009 | | España, Austria, Dinamarca, Francia, Alemania, Grecia, Italia, Países Bajos, Suecia y Suiza | 816 personas residentes en la comunidad | | | Número de años de educación. | |
|  |  | Fragilidad | | Soler-Vila95 | 2016 | | España | 1.857 personas residentes en la comunidad (51,3% mujeres) | | | Estudios primarios o inferiores; estudios secundarios; estudios universitarios. | |
|  |  | **Dependencia (n = 2)** | |  |  | |  |  | | |  | |
|  |  | Dependencia  Recepción de ayuda | | Brugulat-Guiteras45 | 2011 | | Cataluña | 3.566 personas residentes en la comunidad | | | Estudios primarios como máximo; estudios secundarios; estudios universitarios; otros. | |
|  |  | Dependencia | | Lázaro31 | 2007 | | Zaragoza ciudad | 375 personas residentes en la comunidad (56,8% mujeres) | | | Menos que educación primaria; educación primaria o más. | |
|  |  | **Miedo a caerse/ caídas (n = 2)** | |  |  | |  |  | | |  | |
|  |  | Miedo a caerse | | Párraga44 | 2010 | | Albacete ciudad | 919 personas residentes en la comunidad (54,3% mujeres) | | | Analfabetx o solo lee y escribe; estudios primarios; estudios secundarios, medios o superiores. Se agrupan en dos categorías para el análisis: analfabetismo o solo leer y escribir, y estudios primarios, secundarios, medios o superiores. | |
|  |  | Caídas | | Varas-Fabra29 | 2006 | | Córdoba  ciudad | 362 personas residentes en la comunidad (58,3% mujeres) | | | Sin estudios; educación primaria; educación secundaria. | |
|  |  | **Equilibrio dinámico (n = 1)** | |  |  | |  |  | | |  | |
|  |  | Equilibrio dinámico | | Rodriguez57 | 2012 | | Madrid | 448 personas sin discapacidades (62,7% mujeres) | | | Sin educación formal; estudios primarios; estudios secundarios; estudios superiores. | |
|  | **Salud percibida (n = 15)** | | |  |  | |  |  | | |  | |
|  |  | |  | Aguilar-Palacio69 | 2015 | | España | Muestra poblacional residente en la comunidad | | | Bajo (ISCED 0-1: personas sin estudios o con estudios primarios); medio (ISCED 2-4: enseñanza secundaria y profesional de grado medio); alto (ISCED 5-6: enseñanza profesional superior y estudios universitarios). | |
|  |  | |  | Costa-Font33 | 2008 | | 16 comunidades autónomas | 729 personas | | | Sin educación formal; educación primaria completa; educación secundaria completa o superior. Se agrupan en dos categorías para el análisis: analfabetismo y algún grado de alfabetización. | |
|  |  | |  | Damián34 | 2008 | | Madrid ciudad | 669 personas institucionalizadas (75% mujeres) | | | Menor que educación primaria; estudios primarios (8 años); estudios secundarios (12 o más años). | |
|  |  | |  | Fernández-Martínez52 | 2012 | | 14 comunidades autónomas | 1.106 personas (56,3% mujeres) sin deterioro cognitivo y residentes en la comunidad | | | Menor que estudios primarios; estudios primarios; estudios secundarios; estudios superiores. | |
|  |  | |  | Girón55 | 2012 | | España | 7.835 personas residentes en la comunidad (57,3% mujeres) | | | Analfabetx o sin educación; educación primaria y primer ciclo de secundaria; segundo ciclo de educación secundaria y postsecundaria; educación universitaria. | |
|  |  | |  | Girón101 | 2016 | | España | Personas residentes en la comunidad: 4.332 en 2001, 6.134 en 2003, 7.835 en 2006 y 6.026 en 2011-2012 (57,3% mujeres en todo el periodo estudiado) | | | Sin estudios; estudios obligatorios; estudios postobligatorios; estudios universitarios. | |
|  |  | |  | Huisman19 | 2003 | | España, Bélgica, Francia, Alemania, Gran Bretaña, Grecia, Irlanda, Italia, Holanda y Portugal | 4.767 personas residentes en la comunidad (56,3% mujeres) | | | Menos que segunda fase de educación secundaria; segunda fase de educación secundaria; educación de tercer nivel reconocida. | |
|  |  | |  | Karlsdotter48 | 2011 | | 17 comunidades autónomas | 6.259 personas (56,4% mujeres) | | | Educación primaria; educación secundaria de 1ª etapa; educación secundaria de 2ª etapa; formación e inserción laboral; educación superior. | |
|  |  | |  | Lasheras15 | 2001 | | Oviedo | 352 personas (61,9% mujeres), de quienes 161 estaban institucionalizadas | | | Bajo (educación primaria o inferior); alto (de educación secundaria parcial a educación universitaria completa). | |
| Nivel socioeconómico (nivel educativo) |  | |  | Morcillo8 | 2014 | | Estudios publicados en España | 20 estudios, entre ellos Brugulat-Guiteras et al.45, Girón55, Gonzalo21, Karlsdotter et al.48, Lázaro et al.31, Rodriguez-Rodriguez et al.51, Rueda y Artazcoz38, Rueda58 y Sanchez-Santos et al.88  Residentes en la comunidad | | |  | |
|  |  | |  | Orfila84 | 2000 | | Barcelona ciudad | 1.315 personas residentes en la comunidad (61,5% mujeres) y 754 en el seguimiento (66,3% mujeres; 19 institucionalizadas) | | | Educación secundaria o universitaria; educación primaria; analfabeto/a. | |
|  |  | |  | Pino65 | 2014 | | España | 1.106 personas residentes en la comunidad (56,3% mujeres) | | | Menos que estudios primarios; estudios primarios; estudios secundarios/superiores. | |
|  |  | |  | Regidor87 | 2010 | | España | 4.008 personas residentes en la comunidad | | | Bajo (analfabetx y educación primaria incompleta); medio (educación primaria completa); alto (educación secundaria o superior completa). | |
|  |  | |  | Rueda38 | 2009 | | Cataluña | 2.597 personas sin un trabajo remunerado y residentes en la comunidad (57,1% mujeres) | | | Más que estudios primarios; estudios primarios; menos que estudios primarios. | |
|  |  | |  | Zunzunegui85 | 2006 | | Leganés (Madrid) | 2.283 personas residentes en la comunidad (27,8% mujeres) | | | Al menos educación primaria; menos que educación primaria. | |
|  | **Morbilidad (n = 12)** | | |  |  | |  |  | | |  | |
|  |  | | Edentulismo | Eustaquio-Raga60 | 2013 | | Comunidad Valenciana | 531 personas institucionalizadas y residentes en la comunidad (55,7% mujeres) | | | Sin escolarización (analfabetx); educación primaria (escolarización básica); educación superior (formación profesional, bachillerato o estudios universitarios). | |
|  |  | | Índice de masa corporal | Ferra53 | 2012 | | Menorca | 402 personas residentes en la comunidad (53,5% mujeres) | | | Bajo (<6 años de escolarización); medio (6-12 años de educación); alto (>12 años de educación). | |
|  |  | | Diabetes | Jimenez-Garcia37 | 2009 | | 17 comunidades autónomas | 10.711 personas con EPOC estable, de ellas 1.810 tienen diabetes (24,4% mujeres) | | | Analfabetx; educación primaria; educación secundaria; educación universitaria. | |
|  |  | | Discapacidad visual o auditiva autorreferida  Autopercepción de habilidad masticatoria | Lasheras15 | 2001 | | Oviedo | 352 personas (61,9% mujeres), de quienes 161 estaban institucionalizadas | | | Bajo (educación primaria o inferior); alto (de educación secundaria parcial a educación universitaria completa). | |
|  |  | | Eventos cardiovasculares:  infarto de miocardio, ictus y muerte por enfermedad cardiovascular | Mejía-Lancheros92 | 2014 | | España | 7.263 personas con alto riesgo cardiovascular(57,5% mujeres) | | | Educación superior (estudios secundarios o universitarios); educación primaria (escuela primaria completada); menos que educación primaria. Se agrupan en dos categorías para el análisis: educación superior (estudios secundarios o universitarios) y baja educación (hasta la escuela primaria). | |
|  |  | | Factores de riesgo cardiovascular | Pérez-Hernández82 | 2017 | | España | 2.699 personas residentes en la comunidad (53,0% mujeres) | | | Estudios primarios o menos; estudios secundarios; estudios universitarios. | |
|  |  | | Función visual  Agudeza visual | Quintana91 | 2013 | | 4 comunidades autónomas | 4.715 personas operadas de cataratas (58,8% mujeres) | | | Sin estudios; estudios primarios; estudios secundarios o superiores. | |
|  |  | | Hipertensión y sus factores de riesgo | Regidor28 | 2006 | | España | 4.009 personas residentes en la comunidad(56,6% mujeres) | | | Bajo (analfabetx y sin estudios primarios completos); medio (estudios primarios completos); alto (estudios secundarios o superiores completos). | |
|  |  | | Obesidad e hipertensión | Regidor90 | 2012 | | España | 3.991 personas residentes en la comunidad | | | Bajo (analfabetx y educación primaria incompleta); medio (educación primaria completa); alto (educación secundaria o superior completa). | |
|  |  | | Enfermedad limitante de larga duración | Rueda38 | 2009 | | Cataluña | 2.597 personas sin un trabajo remunerado y residentes en la comunidad (57,1% mujeres) | | | Más que estudios primarios; estudios primarios; menos que estudios primarios. | |
|  |  | | Diabetes, cáncer, y enfermedades cardiovascular, pulmonar crónica y musculoesquelética | Soler-Vila95 | 2016 | | España | 1.857 personas residentes en la comunidad (51,3% mujeres) | | | Estudios primarios o inferiores; estudios secundarios; estudios universitarios. | |
|  |  | | Obesidad  Sobrepeso | Suárez-Gómez83 | 2017 | | Badajoz cuidad | 272 personas residentes en la comunidad (59,9% mujeres) | | | Sin estudios; estudios básicos; estudios superiores. | |
|  | **Salud mental y emocional (n = 14)** | | |  |  | |  |  | | |  | |
|  |  | | Declive cognitivo | Cadar97 | 2017 | | España, Austria, Suecia, Alemania, Holanda, Italia, Francia, Dinamarca, Suiza y Bélgica | 1.247 personas en España | | | Número de años de educación completados. | |
|  |  | | Soledad | Fokkema54 | 2012 | | España, Austria, Bélgica, República Checa, Dinamarca, Francia, Alemania, Grecia, Irlanda, Italia, Holanda, Polonia, Suecia y Suiza | 744 personas residentes en la comunidad en España  (53,9% mujeres) | | | Bajo (educación preprimaria, primaria o primera fase de educación básica, y secundaria baja o segunda fase de educación básica); intermedio (educación secundaria –superior-, y educación postsecundaria no terciaria); alto (primera fase de educación terciaria y segunda fase de educación terciaria) | |
|  |  | | Sentido de coherencia | Giglio71 | 2015 | | España | 1.106 personas residentes en la comunidad(56,3% mujeres) | | | Analfabetx/sin educación primaria; educación primaria; educación secundaria; educación superior. | |
|  |  | | Rendimiento cognitivo | Gonzalez81 | 2017 | | España | 832 personas (49,0% mujeres) sin diagnóstico de enfermedad relacionada con la memoria, Parkinson o depresión, con puntuación de 24 o superior en la versión española de Mini-Mental State Examination y residentes en la comunidad | | | Valor que considera el número de años precisados para acabar cada ciclo de estudios. | |
|  |  | | Deterioro cognitivo | Graciani26 | 2006 | | España (420 secciones censales) | 2.630 personas residentes en la comunidad no dementes y sin diagnóstico de depresión (53,5% mujeres) | | | Sin educación formal; estudios primarios; estudios secundarios o superiores. | |
|  |  | | Infelicidad | Lasheras15 | 2001 | | Oviedo | 352 personas (61,9% mujeres), de quienes 161 estaban institucionalizadas | | | Bajo (educación primaria o inferior); alto (de educación secundaria parcial a educación universitaria completa). | |
|  |  | | Declive cognitivo | Lipnicki98 | 2017 | | Zaragoza (España), Australia, Brasil, Francia, Grecia,  Hong Kong, Italia, Japón, Singapur, Corea del Sur, Reino Unido, EE.UU. | 4.744 personas en Zaragoza (57,7% mujeres) | | | Número de años. | |
|  |  | | Morbilidad psiquiátrica (demencia, depresión o ansiedad) | Lobo-Escolar35 | 2008 | | Zaragoza ciudad | 4.803 personas (57,7% mujeres), incluidas institucionalizadas | | | Analfabetx/educación primaria incompleta; educación primaria. | |
|  |  | | Demencia | Martínez14 | 2000 | | 41 provincias españolas | 5.169 personas residentes en la comunidad que van a consultas de atención primaria (53,4% mujeres) | | | Menor que educación primaria; educación primaria (escolarización hasta los 10 años); educación secundaria (escolarización hasta los 17 años); educación universitaria. | |
|  |  | | Quejas subjetivas de memoria | Montejo50 | 2011 | | Madrid ciudad | 1.637 personas residentes en la comunidad (60,4% mujeres) | | | Educación primaria; educación secundaria; educación terciaria (universidad). | |
|  |  | | Bienestar emocional | Prieto-Flores36 | 2008 | | Madrid | 479 personas residentes en la comunidad | | | Educación inferior a primaria; educación primaria; educación secundaria o superior. | |
|  |  | | Salud mental | Rueda38 | 2009 | | Cataluña | 2.597 personas sin un trabajo remunerado y residentes en la comunidad (57,1% mujeres) | | | Más que estudios primarios; estudios primarios; menos que estudios primarios. | |
|  |  | | Función cognitiva  Síntomas depresivos | Sanchez-Santos88 | 2011 | | Leganés (Madrid) | 1.016 personas residentes en la comunidad (49,5% mujeres),  615 defunciones (42,8% mujeres) | | | Analfabetx; estudios primarios incompletos; estudios primarios completes. Se agrupan en dos categorías para el análisis: analfabetismo y alguna educación. | |
|  |  | | Depresión | Soler-Vila95 | 2016 | | España | 1.857 personas residentes en la comunidad (51,3% mujeres) | | | Estudios primarios o inferiores; estudios secundarios; estudios universitarios. | |
|  | **Calidad de vida (n = 7)** | | |  |  | |  |  | | |  | |
|  |  | | Calidad de vida | Artacho63 | 2014 | | Centros de atención primaria en Jaén | 168 pacientes crónicos con EPOC, gonartrosis crónica y hemodiálisis crónica (58,9% mujeres) | | | Analfabetx; puede leer y escribir; educación primaria; educación superior. | |
|  |  | | Calidad de vida | Castro-Monteiro76 | 2016 | | 10 provincias españolas | 525 personas con demencia institucionalizadas (y sus personas cuidadoras -profesionales o familiares) (82,7% mujeres) | | | Menor que educación primaria; educación primaria o superior. | |
|  |  | | Evolución en la calidad de vida | Ceresuela86 | 2008 | | Cuenca | 519 personas residentes en la comunidad (52,8% mujeres) inicialmente, finalizaron 356 personas | | | Analfabetx; lee y escribe; estudios primarios o superiores; | |
|  |  | | CVRS oral | Cornejo59 | 2013 | | Barcelona provincia | 194 personas institucionalizadas (71,1% mujeres) | | | Menor que educación primaria; educación primaria o superior. | |
|  |  | | CVRS en EPOC | Miravitlles49 | 2011 | | España | 4.574 pacientes con EPOC  (16,7% mujeres) | | | Alto (educación secundaria y universitaria completada); medio (educación primaria completada); bajo (sin educación y educación primaria inacabada) | |
|  |  | | CVRS | Oliva-Moreno43 | 2010 | | Cataluña y Canarias | Cataluña: 3.111 personas (55,6% mujeres)  Canarias: 852 personas (61,9% mujeres)  Residentes en la comunidad | | | Estudios no completados; educación primaria completa; educación secundaria completa; educación universitaria completa. | |
|  |  | | CVRS | Pino65 | 2014 | | España | 1.106 personas residentes en la comunidad (56,3% mujeres) | | | Menos que estudios primarios; estudios primarios; estudios secundarios/superiores. | |
|  | **Mortalidad (n = 11)** | | |  |  | |  |  | | |  | |
|  |  | | Mortalidad por lesiones de tráfico, caídas, sobredosis, suicidio y otras lesiones | Borrell18 | 2002 | | Barcelona ciudad | 1.901 defunciones (54,6% mujeres) | | | Sin escolarización (analfabetx, sin educación y 0-4 años de escolarización); estudios primarios (5-11 años de escolarización); estudios secundarios o superiores (≥12 años). | |
|  |  | | Mortalidad por todas las causas sucedidas durante la ola de calor | Borrell25 | 2006 | | Barcelona ciudad | 3.594 defunciones (58,6% mujeres) | | | Bajo (0-4 años de escolarización); menos que educación primaria (5-6 años de escolarización); educación primaria o superior (7 o más años de escolarización). | |
|  |  | | Mortalidad | Contador80 | 2017 | | 3 áreas de España central | Personas institucionalizadas y residentes en la comunidad: 269 con demencia (70,3%mujeres), de ellas 171 fallecieron;  2.944 sin demencia (57,4% mujeres), de las que fallecieron 229 | | | Analfabetx; lee y escribe; estudios primarios; estudios secundarios o superiores. | |
|  |  | | Mortalidad | Huisman23 | 2004 | | Madrid, Barcelona, Turín, Finlandia, Noruega, Dinamarca, Inglaterra/Gales, Bélgica, Francia, Suiza y Austria | Barcelona: 5.062.774 personas años en riesgo (55,3% mujeres años en riesgo).  Madrid: 4.445.835 personas años en riesgo (54,0% mujeres años en riesgo). | | | Bajo (ISCED 0-2: educación preprimaria, primaria, y secundaria baja); medio (ISCED 3: educación secundaria alta); alto (ISCED 4-6: educación postsecundaria). Se agrupan en dos categorías para el análisis: bajo y medio/alto. | |
|  |  | | Mortalidad por neumonía adquirida en la comunidad tras 30 días de hospitalización | Izquierdo42 | 2010 | | Aragón, Cataluña y Galicia | 651 personas hospitalizadas por neumonía y residentes en la comunidad (37,9% mujeres) | | | Menor que educación primaria; educación secundaria o superior. | |
|  |  | | Mortalidad total  Mortalidad por causa de muerte más frecuente en cada grupo de edad. Las causas analizadas a partir de 65 años son cáncer, enfermedades cardiovasculares, respiratorias y digestivas. | Miqueléiz72 | 2015 | | Navarra | 594.056,58 personas-año en riesgo (57,8% mujeres)  26.329 defunciones (49,8% mujeres) | | | Educación primaria o inferior; educación secundaria de primer ciclo; educación secundaria de 2º ciclo; educación universitaria. | |
|  |  | | Mortalidad | Regidor17 | 2001 | | Madrid (comunidad autónoma) | 606.168 personas (60,5% mujeres)  28.770 defunciones (49,9% mujeres) | | | Sin estudios; estudios de primer grado; estudios de segundo grado, primer ciclo; estudios de segundo grado, segundo ciclo; estudios de tercer grado. | |
|  |  | | Mortalidad | Regidor87 | 2010 | | España | 4.008 personas residentes en la comunidad | | | Bajo (analfabetx y educación primaria incompleta); medio (educación primaria completa); alto (educación secundaria o superior completa). | |
|  |  | | Mortalidad | Regidor90 | 2012 | | España | 3.991 personas residentes en la comunidad | | | Bajo (analfabetx y educación primaria incompleta); medio (educación primaria completa); alto (educación secundaria o superior completa). | |
|  |  | | Mortalidad por todas las causas  Mortalidad por cáncer, enfermedades cardiovasculares, respiratorias, digestivas y accidentes y causas externas | Regidor73 | 2015a | | Toda la población española  +  Población de Madrid | 41.593.291 personas-años en España y 3.370.101 en Madrid  1.903.593 defunciones en España y 140.182 en Madrid | | | Segunda fase de educación terciaria; primera fase de educación terciaria; educación secundaria alta; educación secundaria baja; educación primaria; sin educación. | |
|  |  | | Mortalidad por todas las causas  Mortalidad por cáncer, enfermedades cardiovasculares, respiratorias, digestivas y accidentes y causas externas. | Regidor74 | 2015b | | 50 provincias de España | 41.593.291 personas-años (69,5% mujeres)  1.903.593 defunciones (51,1% mujeres) | | | Educación terciaria, segunda fase; educación terciaria, primera fase; educación secundaria alta; educación secundaria baja; educación primaria; sin educación formal. | |
|  |  | | Mortalidad por todas las causas  Mortalidad por las principales causas de muerte (cáncer, enfermedades cardiovasculares, respiratorias, digestivas, accidentes y otras causas) | Reques75 | 2015 | | España | 42 millones de personas –años  1.908.012 defunciones | | | Bajo (ISCED 0: analfabetx o menos de 5 años de estudios); medio-bajo (ISCED 1: 5 o más años, pero sin completar el primer ciclo de educación secundaria); medio-alto (ISCED 2: primer ciclo de educación secundaria completo); alto (ISCED 3-6: segundo ciclo de educación secundaria o superior). | |
|  | **Esperanza de vida (n = 1)** | | |  |  | |  |  | | |  | |
|  |  | | Esperanza de vida  Esperanza de vida en buena salud percibida | Martinez-Sanchez16 | 2001 | | Madrid y Barcelona (ciudades) | No indicado | | | Bajo (hasta 11 años de escolarización); alto (12 o más años de escolarización). | |
| **Ocupación (n = 17)** | | |  |  |  | |  |  | | |  | |
|  | **Estado funcional (n = 7)** | | |  |  | |  |  | | |  | |
|  |  | | **Fragilidad (n = 2)** |  |  | |  |  | | |  | |
|  |  | | Síndrome de fragilidad | Garcia-Garcia46 | 2011 | | Provincia de Toledo | 2.488 personas (56,1% mujeres)  1,9% institucionalizadas | | | Trabajadorxs no manuales; trabajadorxs manuales; trabajadorxs no cualificadxs; amas de casa. | |
|  |  | | Fragilidad | Soler-Vila95 | 2016 | | España | 1.857 personas residentes en la comunidad (51,3% mujeres) | | | Manual; no manual. | |
|  |  | **Dependencia (n = 3)** | |  |  | |  |  | | |  | |
|  |  | | Dependencia  Recepción de ayuda | Brugulat-Guiteras45 | 2011 | | Cataluña | 3.566 personas residentes en la comunidad | | | Grupos I-II; grupo III; grupos IV-V. | |
|  |  | | Dependencia | Gonzalo21 | 2004 | | España | Población analizada en dos encuestas distintas | | | Clase social I-II; clase III; clase IV. | |
| Ocupación laboral desempeñada durante más tiempo |  | | Dependencia en 3 AIVD: preparar la comida, hacer las compras y hacer tareas domésticas (ligeras) | Nikula20 | 2003 | | Leganés (Madrid, España), Finlandia, Israel, Italia, Países Bajos, Suecia | 1.200 personas residentes en la comunidad (50% mujeres) | | | No manual (incluyendo no manual alto y bajo); manual (incluyendo manuales especializados y no especializados, agricultores/as y labores del hogar) | |
|  |  | **Miedo a caerse/caídas (n = 2)** | |  |  | |  |  | | |  | |
| Clase social basada en la ocupación ejercida durante la mayor parte de su vida |  | | Miedo a caerse | Párraga44 | 2010 | | Albacete ciudad | 919 personas residentes en la comunidad (54,3% mujeres) | | | Clases I, II, III y IV (directivos/as, funcionarios/as, profesionales liberales, técnicos/as superiores, cuadros y mandos intermedios, administrativos/as, personal de los servicios de protección y seguridad, y trabajadores/as manuales cualificados/as); clases V y VI (trabajadores/as manuales no cualificados/as –industria, comercio, servicios y sector primario- y amas de casa). | |
|  |  | | Caídas | Varas-Fabra29 | 2006 | | Córdoba  ciudad | 362 personas residentes en la comunidad (58,3% mujeres) | | | Clases I-III (profesiones liberales, directivos/as, técnicos/as superiores y medios/as, comerciantes, cuadros intermedios y administrativos/as); clase IV (trabajadores/as manuales cualificados/as y semicualificados/as); clase V (trabajadores no cualificados/as y no clasificables; miembros de las fuerzas armadas, agricultor/a, trabajo doméstico, conserje y militares) | |
|  | **Salud percibida (n = 3)** | | |  |  | |  |  | | |  | |
|  |  | |  | Girón55 | 2012 | | España | 7.835 personas residentes en la comunidad (57,3% mujeres) | | | Clase I/clase II; clase III; clase IV; clase V. | |
|  |  | |  | Gonzalo21 | 2004 | | España | Población analizada en dos encuestas distintas | | | Clase social I-II; clase III; clase IV. | |
| Nivel socioeconómico (clase social) |  | |  | Morcillo8 | 2014 | | Estudios publicados en España | 20 estudios, entre ellos Brugulat-Guiteras et al.45, Girón55, Gonzalo21, Karlsdotter et al.48, Lázaro et al.31, Rodriguez-Rodriguez et al.51, Rueda y Artazcoz38, Rueda58 y Sanchez-Santos et al.88  Residentes en la comunidad | | |  | |
|  | **Morbilidad (n = 6)** | | |  |  | |  |  | | |  | |
|  |  | | Problemas de salud crónicos | Gonzalo21 | 2004 | | España | Población analizada en dos encuestas distintas | | | Clase social I-II; clase III; clase IV. | |
| Ocupación propia  Ocupación del padre |  | | Factores de riesgo cardiovascular | Pérez-Hernández82 | 2017 | | España | 2.699 personas residentes en la comunidad (53,0% mujeres) | | | Manual; no manual.  Manual; no manual. | |
| Ocupación del cabeza de familia |  | | Salud dental | Pizarro27 | 2006 | | Barcelona ciudad | 561 personas residentes en la comunidad(65.6% mujeres) | | | Clase I-II (directivos/as o profesionales independientes asociados con estudios universitarios, artistas y deportistas); clase III (jóvenes directivos/as, gestores/as y empleados/as, trabajadores/as de emergencias y seguridad pública); clase IV-V (trabajadores/as manuales). | |
| Ocupación |  | | Hipertensión y sus factores de riesgo | Regidor28 | 2006 | | España | 4.009 personas residentes en la comunidad(56,6% mujeres) | | | Trabajadores/as no manuales (profesionales, gestores/as, propietarios/as y administrativos/as); trabajadores/as del campo autónomos/as; trabajadores/as manuales cualificados/as; trabajadores/as manuales no cualificados/as. | |
| Última o actual ocupación |  | | Obesidad e hipertensión | Regidor90 | 2012 | | España | 3.991 personas residentes en la comunidad | | | Trabajadores/as no manuales (profesionales, gestores/as, propietarios/as y administrativos/as); trabajadores/as manuales (cualificados/as y no cualificados/as); trabajadores/as del campo. | |
|  |  | | Diabetes, cáncer, y enfermedades cardiovascular, pulmonar crónica y musculoesquelética | Soler-Vila95 | 2016 | | España | 1.857 personas residentes en la comunidad (51,3% mujeres) | | | Manual; no manual. | |
|  | **Salud mental y emocional (n = 2)** | | |  |  | |  |  | | |  | |
| Clase social (en trabajadores/as) |  | | Quejas subjetivas de memoria | Montejo50 | 2011 | | Madrid ciudad | 1.637 personas residentes en la comunidad (60,4% mujeres) | | | Clase I-II (profesionales ejecutivos/as); clase III (trabajadores/as no manuales cualificados/as); clase IV (trabajadores/as manuales cualificados/as); clase V (trabajadores/as no cualificados/as); X (labores del hogar). | |
|  |  | | Depresión | Soler-Vila95 | 2016 | | España | 1.857 personas residentes en la comunidad (51,3% mujeres) | | | Manual; no manual. | |
|  | **Mortalidad (n = 3)** | | |  |  | |  |  | | |  | |
|  |  | | Mortalidad por neumonía adquirida en la comunidad tras 30 días de hospitalización | Izquierdo42 | 2010 | | Aragón, Cataluña y Galicia | 651 personas hospitalizadas por neumonía y residentes en la comunidad (37,9% mujeres) | | | Clase social alta/media (grupo I -gestores de administraciones públicas y empresas con más de 10 empleados/as, profesiones asociadas con educación universitaria postgrado-, grupo II -gestores de empresas con menos de 10 empleados/as, profesiones asociadas con educación universitaria, artistas y deportistas-, grupo III -funcionarios/as, secretarios/as, trabajadores/as en finanzas, autónomos/as, supervisores/as de trabajadores/as manuales-, grupo IVa -trabajadores/as cualificados/as-, grupo IVb -trabajadores/as semicualificados/as); clase social baja (grupo V -trabajadores/as no cualificados/as). | |
| Última o actual ocupación |  | | Mortalidad | Regidor90 | 2012 | | España | 3.991 personas residentes en la comunidad | | | Trabajadores/as no manuales (profesionales, gestores/as, propietarios/as y administrativos/as); trabajadores/as manuales (cualificados/as y no cualificados/as); trabajadores/as del campo. | |
|  |  | | Mortalidad por todas las causas  Mortalidad por cáncer, enfermedades cardiovasculares, respiratorias, digestivas y accidentes y causas externas | Regidor73 | 2015a | | Toda la población española  +  Población de Madrid | 41.593.291 personas-años en España y 3.370.101 en Madrid  1.903.593 defunciones en España y 140.182 en Madrid | | | Gestores/as y profesionales; técnicos/as; administrativos/as y trabajadores/as de servicios; trabajadores/as manuales cualificados/as; trabajadores/as manuales no cualificados; desempleados/as; económicamente inactivos/as (con discapacidad, jubilados/as, amas de casa). | |
|  |  | | Mortalidad por todas las causas  Mortalidad por cáncer, enfermedades cardiovasculares, respiratorias, digestivas y accidentes y causas externas. | Regidor74 | 2015b | | 50 provincias de España | 41.593.291 personas-años (69,5% mujeres)  1.903.593 defunciones (51,1% mujeres) | | | Gestores/as y profesionales; técnicos/as; administrativos/as y trabajadores/as de servicios; trabajadores/as manuales cualificados/as; trabajadores/as manuales no cualificados; desempleados/as; económicamente inactivos/as (con discapacidad, jubilados/as, amas de casa). | |
|  | **Calidad de vida (n = 1)** | | |  |  | |  |  | | |  | |
| Ocupación desempeñada durante más tiempo |  | | CVRS en EPOC | Miravitlles49 | 2011 | | España | 4.574 pacientes con EPOC  (16,7% mujeres) | | | Clase I (gestores y profesionales –no manuales- de los grupos principales 1 y 2); clase II (técnicos/as y profesionales asociados/as del grupo principal 3); clase III (otros trabajadores no manuales de los grupos principales 4 y 5); clase IV (trabajadores/as manuales cualificados/as de los grupos principales 6 y 7); clase V (trabajadores/as semicualificados/as o no cualificados/as de los grupos principales 8 y 9). | |
| **Nivel económico objetivo (n = 16)** | | | |  |  | |  |  | | |  | |
|  | **Estado funcional (n = 7)** | | |  |  | |  |  | | |  | |
|  |  | **Discapacidad (n = 3)** | |  |  | |  |  | | |  | |
| Ingresos |  | | Discapacidad en ABVD | Abellán68 | 2015 | | España | 3.970 personas residentes en la comunidad  (70,9% mujeres) | | | Bajos (menor de 625 €/mes por unidad de consumo); altos (por encima de dicho umbral). | |
| Ingresos individuales |  | | Discapacidad | Costa-Font33 | 2008 | | 16 comunidades autónomas | 729 personas | | | Variable continua. | |
| Ingresos netos del hogar |  | | Reducción en AD  Limitación en AD por problema de salud físico o mental, enfermedad o discapacidad | Huisman19 | 2003 | | España, Bélgica, Francia, Alemania, Gran Bretaña, Grecia, Irlanda, Italia, Holanda y Portugal | 4.767 personas residentes en la comunidad (56,3% mujeres) | | | Quintiles. | |
|  |  | | **Fragilidad (n = 3)** |  |  | |  |  | | |  | |
| Nivel económico |  | | Fragilidad: limitación de EPOC en AD | Álvarez-Gutiérrez30 | 2007 | | España | 1.057 pacientes con EPOC (4,6% mujeres) | | | Bajo; medio; alto. | |
| Ingresos mensuales totales del hogar |  | | Fragilidad | Castell40 | 2010 | | Barrio de Peñagrande (Madrid) | 814 personas (51,4% mujeres) | | | <900 €; 900-1.200 €; >1.200 €. | |
| Ingresos mensuales |  | | Fragilidad | Jürschik47 | 2011 | | Lleida ciudad | 323 personas con tarjeta sanitaria y residentes en viviendas familiares (57,6% mujeres) | | | ≥ 900 €; < 900 €. | |
|  |  | | **Equilibrio dinámico (n = 1)** |  |  | |  |  | | |  | |
| Ingresos familiares |  | | Equilibrio dinámico | Rodriguez57 | 2012 | | Madrid | 448 personas sin discapacidades (62,7% mujeres) | | | <900 €; 900-1.600 €; >1.600 €. | |
|  | **Salud percibida (n = 5)** | | |  |  | |  |  | | |  | |
| Ingresos individuales |  | |  | Costa-Font33 | 2008 | | 16 comunidades autónomas | 729 personas | | | Variable continua. | |
| Ingresos familiares mensuales |  | |  | Girón55 | 2012 | | España | 7.835 personas residentes en la comunidad (57,3% mujeres) | | | ≤900 €; 901-1.201 €; 1.201-1.800 €; >1.800 €. | |
| Ingresos netos del hogar |  | |  | Huisman19 | 2003 | | España, Bélgica, Francia, Alemania, Gran Bretaña, Grecia, Irlanda, Italia, Holanda y Portugal | 4.767 personas residentes en la comunidad (56,3% mujeres) | | | Quintiles. | |
| Renta equivalente del hogar media |  | |  | Karlsdotter48 | 2011 | | 17 comunidades autónomas | 6.259 personas (56,4% mujeres) | | | Variable continua. | |
| Nivel socioeconómico (ingresos, renta equivalente del hogar media, situación económica) |  | |  | Morcillo8 | 2014 | | Estudios publicados en España | 20 estudios, entre ellos Brugulat-Guiteras et al.45, Girón55, Gonzalo21, Karlsdotter et al. 48, Lázaro et al.31, Rodriguez-Rodriguez et al.51, Rueda y Artazcoz38, Rueda58 y Sanchez-Santos et al.88  Residentes en la comunidad | | |  | |
|  | **Morbilidad (n = 2)** | | |  |  | |  |  | | |  | |
| Nivel económico |  | | Índice de masa corporal | Ferra53 | 2012 | | Menorca | 402 personas residentes en la comunidad (53,5% mujeres) | | | Bajo (<6 años de escolarización); medio (6-12 años de educación); alto (>12 años de educación).  Bajo; alto. | |
| Ingresos |  | | Salud oral | Saez-Prado79 | 2016 | | Valencia  ciudad | 202 personas de un club social de personas mayores no dependientes (49,0% mujeres) | | | <3.360 €; 3.360-6.600 €; 6.600-10.000 €; >10.000 €. | |
|  | **Salud mental y emocional (n = 3)** | | |  |  | |  |  | | |  | |
| Ingresos del hogar |  | | Declive cognitivo | Cadar97 | 2017 | | España, Austria, Suecia, Alemania, Holanda, Italia, Francia, Dinamarca, Suiza y Bélgica | 1.247 personas en España | | | Deciles. | |
| Estado económico objetivo (dinero gastado por la familia en las distintas necesidades) |  | | Rendimiento cognitivo | Gonzalez81 | 2017 | | España | 832 personas (49,0% mujeres) sin diagnóstico de enfermedad relacionada con la memoria, Parkinson o depresión, con puntuación de 24 o superior en la versión española de Mini-Mental State Examination y residentes en la comunidad | | | Variable continua. | |
| Nivel socioeconómico (ingresos individuales) |  | | Demencia | Martínez14 | 2000 | | 41 provincias españolas | 5.169 personas residentes en la comunidad que van a consultas de atención primaria (53,4% mujeres) | | | Bajo; intermedio; alto. | |
|  | **Calidad de vida (n = 2)** | | |  |  | |  |  | | |  | |
| Ingresos personales |  | |  | Artacho63 | 2014 | | Centros de atención primaria en Jaén | 168 pacientes crónicos con EPOC, gonartrosis crónica y hemodiálisis crónica (58,9% mujeres) | | | ≤500 €/mes; >500 a ≤1.000 €/mes; >1.000 €/mes. | |
| Ingresos |  | |  | Saez-Prado79 | 2016 | | Valencia  ciudad | 202 personas de un club social de personas mayores no dependientes (49,0% mujeres) | | | <3.360 €; 3.360-6.600 €; 6.600-10.000 €; >10.000 €. | |
| **Nivel económico subjetivo(n = 4)** | | | |  |  | |  |  | | |  | |
|  | **Estado funcional (n = 1)** | | |  |  | |  |  | | |  | |
|  |  | | **Discapacidad (n = 1)** |  |  | |  |  | | |  | |
| Dificultad para llegar a fin de mes  Percepción de la situación económica del hogar |  | | Discapacidad (dificultad para realizar 12 ABVD e AIVD) | Rodriguez-Laso66 | 2014 | | España | 697 personas residentes en la comunidad(56% mujeres) | | | Con mucha dificultad y con dificultad; con los recursos justos; con facilidad y con bastante facilidad.  0-5 puntos; 6-10 puntos. | |
|  | **Salud percibida (n = 1)** | | |  |  | |  |  | | |  | |
| Posición económica percibida |  |  | | Fernández-Martínez52 | 2012 | | 14 comunidades autónomas | 1.106 personas (56,3% mujeres) sin deterioro cognitivo y residentes en la comunidad | | | Quintiles (baja; media-baja; media; alta-media; alta). | |
|  | **Salud mental y emocional (n = 2)** | | |  |  | |  |  | | |  | |
| Percepción de dificultades con ingresos actuales |  | | Soledad | Fokkema54 | 2012 | | España, Austria, Bélgica, República Checa, Dinamarca, Francia, Alemania, Grecia, Irlanda, Italia, Holanda, Polonia, Suecia y Suiza | 744 personas residentes en la comunidad en España  (53,9% mujeres) | | | Cómoda; con relativa facilidad; algunas dificultades; grandes dificultades. | |
| Estado económico subjetivo (satisfacción con los ingresos familiares) |  | | Rendimiento cognitivo | Gonzalez81 | 2017 | | España | 832 personas (49,0% mujeres) sin diagnóstico de enfermedad relacionada con la memoria, Parkinson o depresión, con puntuación de 24 o superior en la versión española de Mini-Mental State Examination y residentes en la comunidad | | | Deciles. | |
| **Vivienda y riqueza material del hogar (n = 6)** | | | |  |  | |  |  | | |  | |
|  | **Estado funcional (n = 2)** | | |  |  | |  |  | | |  | |
|  |  | | **Discapacidad (n = 1)** |  |  | |  |  | | |  | |
| Valor real de la vivienda |  | | Discapacidad | Costa-Font33 | 2008 | | 16 comunidades autónomas | 729 personas | | | Variable continua. | |
|  |  | | **Fragilidad (n = 1)** |  |  | |  |  | | |  | |
| Vivienda propia |  | | Fragilidad: limitación de EPOC en AD | Álvarez-Gutiérrez30 | 2007 | | España | 1.057 pacientes con EPOC (4,6% mujeres) | | | Sí; no. | |
|  | **Salud percibida (n = 2)** | | |  |  | |  |  | | |  | |
| Valor real de la vivienda |  | |  | Costa-Font33 | 2008 | | 16 comunidades autónomas | 729 personas | | | Variable continua. | |
| Privación material: incluyendo tener una ducha/bañera, tener agua caliente, tener calefacción central o dispersada, tener un ascensor y tener una lavadora |  | |  | Rueda38 | 2009 | | Cataluña | 2.597 personas sin un trabajo remunerado y residentes en la comunidad (57,1% mujeres) | | | Sin falta de ninguno de los ítems; falta de uno de los ítems; falta de 2 o más ítems. | |
|  | **Morbilidad (n = 1)** | | |  |  | |  |  | | |  | |
| Privación material: incluyendo tener una ducha/bañera, tener agua caliente, tener calefacción central o dispersada, tener un ascensor y tener una lavadora |  | | Enfermedad limitante de larga duración | Rueda38 | 2009 | | Cataluña | 2.597 personas sin un trabajo remunerado y residentes en la comunidad (57,1% mujeres) | | | Sin falta de ninguno de los ítems; falta de uno de los ítems; falta de 2 o más ítems. | |
|  | **Salud mental y emocional (n = 1)** | | |  |  | |  |  | | |  | |
| Privación material: incluyendo tener una ducha/bañera, tener agua caliente, tener calefacción central o dispersada, tener un ascensor y tener una lavadora |  | | Salud mental | Rueda38 | 2009 | | Cataluña | 2.597 personas sin un trabajo remunerado y residentes en la comunidad (57,1% mujeres) | | | Sin falta de ninguno de los ítems; falta de uno de los ítems; falta de 2 o más ítems. | |
|  | **Mortalidad (n = 3)** | | |  |  | |  |  | | |  | |
| Riqueza material del hogar:   - comodidades del hogar - número de coches en el hogar - disponibilidad de una segunda vivienda para las vacaciones o fines de semana |  | | Mortalidad por todas las causas  Mortalidad por cáncer, enfermedades cardiovasculares, respiratorias, digestivas y accidentes y causas externas | Regidor73 | 2015a | | Toda la población española  +  Población de Madrid | 41.593.291 personas-años en España y 3.370.101 en Madrid  1.903.593 defunciones en España y 140.182 en Madrid | | | Calefacción y aire acondicionado; calefacción o aire acondicionado; no.  2 o más; 1; 0.  Sí; no. | |
| Riqueza material del hogar:   - comodidades del hogar - número de coches en el hogar - disponibilidad de una segunda vivienda para las vacaciones o fines de semana |  | | Mortalidad por todas las causas  Mortalidad por cáncer, enfermedades cardiovasculares, respiratorias, digestivas y accidentes y causas externas. | Regidor74 | 2015b | | 50 provincias de España | 41.593.291 personas-años (69,5% mujeres)  1.903.593 defunciones (51,1% mujeres) | | | Calefacción y aire acondicionado; calefacción o aire acondicionado; no.  2 o más; 1; 0.  Sí; no. | |
| Indicadores que reflejan la riqueza material:   - número de habitaciones en el hogar - superficie del hogar en metros cuadrados - número de coches que pertenecen a los residentes del hogar. |  | | Mortalidad por todas las causas  Mortalidad por las principales causas de muerte (cáncer, enfermedades cardiovasculares, respiratorias, digestivas, accidentes y otras causas) | Reques75 | 2015 | | España | 42 millones de personas –años  1.908.012 defunciones | | | 0-4; 5; 6; ≥6.  0-69; 70-89; 90-100; ≥100.  0; 1; ≥2. | |
| Condiciones de la vivienda: ausencia de ascensor, agua caliente, calefacción, baño interior, bañera o ducha, habitación individual, lavadora automática, teléfono, si se sienten a menudo con frío. |  | | Mortalidad por todas las causas | Zuluaga89 | 2011 | | 4 hospitales españoles (Bilbao, Madrid, Sevilla y Vigo) | 433 personas hospitalizadas por insuficiencia cardiaca  (56,4% mujeres)  260 defunciones | | | Con todos los servicios; falta de un servicio; falta de 2 o más servicios. | |
| **Relación con la actividad laboral (n = 5)** | | | |  |  | |  |  | | |  | |
|  | **Estado funcional (n = 2)** | | |  |  | |  |  | | |  | |
|  |  | | **Fragilidad (n = 1)** |  |  | |  |  | | |  | |
| Situación laboral |  | | Fragilidad: limitación de EPOC en AD | Álvarez-Gutiérrez30 | 2007 | | España | 1.057 pacientes con EPOC (4,6% mujeres) | | | En paro; baja laboral; pensionista; activo. | |
|  |  | | **Dependencia (n = 1)** |  |  | |  |  | | |  | |
| Situación laboral |  | | Dependencia | Pino-Dominguez78 | 2016 | | España | 919 personas residentes en la comunidad (54,7% mujeres) | | | Hombres jubilados; mujeres jubiladas; amas de casa. | |
|  | **Salud percibida (n = 2)** | | |  |  | |  |  | | |  | |
| Estado de actividad actual |  | |  | Pino65 | 2014 | | España | 1.106 personas residentes en la comunidad (56,3% mujeres) | | | Trabajando; jubilado/a; amas de casa; pensionistas (quienes reciben pensiones de viudedad, invalidez u otras no contributivas) | |
| Situación laboral |  | |  | Pino-Dominguez78 | 2016 | | España | 919 personas residentes en la comunidad (54,7% mujeres) | | | Hombres jubilados; mujeres jubiladas; amas de casa. | |
|  | **Morbilidad (n = 3)** | | |  |  | |  |  | | |  | |
| Ocupación |  | | Diabetes | Jimenez-Garcia37 | 2009 | | 17 comunidades autónomas | 10.711 personas con EPOC estable, de ellas 1.810 tienen diabetes (24,4% mujeres) | | | Inactivo/a; activo/a. | |
| Situación laboral |  | | Número de enfermedades crónicas | Pino-Dominguez78 | 2016 | | España | 919 personas residentes en la comunidad (54,7% mujeres) | | | Hombres jubilados; mujeres jubiladas; amas de casa. | |
| Empleo |  | | Función visual  Agudeza visual | Quintana91 | 2013 | | 4 comunidades autónomas | 4.715 personas operadas de cataratas (58,8% mujeres) | | | Empleado/a; labores del hogar; jubilado/a. | |
|  | **Salud mental y emocional (n = 1)** | | |  |  | |  |  | | |  | |
| Situación laboral |  | | Depresión | Pino-Dominguez78 | 2016 | | España | 919 personas residentes en la comunidad (54,7% mujeres) | | | Hombres jubilados; mujeres jubiladas; amas de casa. | |
|  | **Calidad de vida (n = 1)** | | |  |  | |  |  | | |  | |
| Estado de actividad actual |  | | CVRS | Pino65 | 2014 | | España | 1.106 personas residentes en la comunidad (56,3% mujeres) | | | Trabajando; jubilado/a; amas de casa; pensionistas (quienes reciben pensiones de viudedad, invalidez u otras no contributivas) | |
| **Medidas mixtas (n = 5)** | | | |  |  | |  |  | | |  | |
|  | **Salud percibida (n = 1)** | | |  |  | |  |  | | |  | |
| Combinación entre relación con la actividad y ocupación |  | |  | Karlsdotter48 | 2011 | | 17 comunidades autónomas | 6.259 personas (56,4% mujeres) | | | Empresario/a; asalariado/a; parado/a; jubilado/a; otro, inactividad. | |
|  | **Morbilidad (n = 1)** | | |  |  | |  |  | | |  | |
| Índice de exposición acumulativa a lo largo de la vida combinando cinco indicadores de riesgo:  clase social baja en la infancia, nivel de estudios bajo, clase social baja de adulto, inactividad física y obesidad general en la vida adulta |  | | Síndrome metabólico  Componentes del síndrome metabólico:  -Obesidad abdominal  -Presión arterial  elevada  -Diabetes mellitus tipo 2 | Regidor32 | 2007 | | España | 4.009 personas residentes en la comunidad | | | Número de factores de riesgo: 0 a 5. | |
|  | **Salud mental y emocional (n = 2)** | | |  |  | |  |  | | |  | |
| Combinación de relación con actividad laboral y ocupación |  | | Rendimiento cognitivo | Gonzalez81 | 2017 | | España | 832 personas (49,0% mujeres) sin diagnóstico de enfermedad relacionada con la memoria, Parkinson o depresión, con puntuación de 24 o superior en la versión española de Mini-Mental State Examination y residentes en la comunidad | | | Desempleado/a; trabajador/a no cualificado/a; labores del hogar; trabajador/a cualificado/a; trabajador/a técnico/a, maestro/a, profesión liberal, gestor/a; profesorado y ejecutivo/a de alto nivel. | |
| Clase social a partir del nivel educativo y la condición socioeconómica |  | | Bienestar emocional | Prieto-Flores36 | 2008 | | Madrid | 479 personas residentes en la comunidad | | | Baja; media baja; media; media alta/baja. | |
|  | **Calidad de vida (n = 1)** | | |  |  | |  |  | | |  | |
| Recursos económicos |  | |  | Rodriguez-Rodriguez51 | 2011 | | Madrid (comunidad autónoma) | 499 personas residentes en la comunidad | | | Optimistas con base económica (bienestar); optimistas sin base económica (adaptación); pesimistas sin base económica (privación); pesimistas con base económica (disonancia). | |
| ***Ecológico*** |  | |  |  |  | |  |  | | |  | |
| **Índices simples (n = 3)** | | |  |  |  | |  |  | | |  | |
|  | **Salud percibida (n = 1)** | | |  |  | |  |  | | |  | |
| Desigualdad de renta: índice de Gini |  | |  | Karlsdotter48 | 2011 | | 17 comunidades autónomas | 6.259 personas (56,4% mujeres) | | | Variable continua. | |
|  | **Mortalidad (n = 2)** | | |  |  | |  |  | | |  | |
| Ingresos familiares de la municipalidad disponibles per cápita |  | | Mortalidad por neumonía adquirida en la comunidad tras 30 días de hospitalización | Izquierdo42 | 2010 | | Aragón, Cataluña y Galicia | 651 personas hospitalizadas por neumonía y residentes en la comunidad (37,9% mujeres) | | | Bajos (≤12.500 €); altos (>12.500 €). | |
| Inversión en capital humano: porcentaje de población ≥25 años con educación universitaria  Privación: tasa de desempleados/as |  | | Mortalidad por todas las causas  Mortalidad por cáncer, enfermedades cardiovasculares, respiratorias, digestivas y accidentes y causas externas | Regidor73 | 2015a | | Toda la población española  +  Población de Madrid | 41.593.291 personas-años en España y 3.370.101 en Madrid  1.903.593 defunciones en España y 140.182 en Madrid | | | Cuartiles.  Cuartiles. | |
| Desigualdades en ingresos  Ingresos per cápita |  | | Mortalidad por todas las causas  Mortalidad por cáncer, enfermedades cardiovasculares, respiratorias, digestivas y accidentes y causas externas. | Regidor74 | 2015b | | 50 provincias de España | 41.593.291 personas-años (69,5% mujeres)  1.903.593 defunciones (51,1% mujeres) | | | < 0,278; 0,278-0,294; 0,295-0,303; >0,303.  >18.000 €; 15.001-18.000 €; 12.900-15.000 €; <12.900 €. | |
| **Índices compuestos (n = 7)** | | |  |  |  | |  |  | | |  | |
|  | **Salud percibida (n = 2)** | | |  |  | |  |  | | |  | |
| Bienestar per cápita regional |  | |  | Karlsdotter48 | 2011 | | 17 comunidades autónomas | 6.259 personas (56,4% mujeres) | | | Variable continua. | |
| Nivel de desarrollo socioeconómico de la región de residencia |  | |  | Rueda58 | 2012 | | País Vasco  Navarra  Andalucía  Murcia | País Vasco: 245 personas (58,4% mujeres)  Navarra: 393 personas (67,4% mujeres)  Andalucía: 543 personas (68,3% mujeres)  Murcia: 421 personas (68,4% mujeres)  Sin un empleo remunerado y residentes en la comunidad | | | Alto; bajo. | |
|  | **Morbilidad (n = 2)** | | |  |  | |  |  | | |  | |
| Índice de privación: considera el porcentaje de trabajadores/as manuales, desempleo, empleo temporal, y bajo nivel educativo en general y en población joven (16-29 años). |  | | Multimorbilidad | Orueta61  Orueta64 | 2013  2014 | | País Vasco | 452.698 personas (57,5% mujeres) | | | Quintiles. | |
| Índice de privación (MEDEA) |  | | Multimorbilidad | Violan67 | 2014 | | Cataluña | 266.813 personas  (57,4% mujeres) | | | Quintiles. | |
|  | **Salud mental y emocional (n = 1)** | | |  |  | |  |  | | |  | |
| Nivel de desarrollo socioeconómico de la región de residencia |  | | Salud mental | Rueda58 | 2012 | | País Vasco  Navarra  Andalucía  Murcia | País Vasco: 245 personas (58,4% mujeres)  Navarra: 393 personas (67,4% mujeres)  Andalucía: 543 personas (68,3% mujeres)  Murcia: 421 personas (68,4% mujeres)  Sin un empleo remunerado y residentes en la comunidad | | | Alto; bajo. | |
|  | **Mortalidad (n = 3)** | | |  |  | |  |  | | | **Mortalidad (n = 3)** | |
| Privación socioeconómica a partir de indicadores de desempleo e instrucción insuficiente |  | | Mortalidad por todas las causas | Dalmau-Bueno99 | 2010 | | Barcelona ciudad: áreas básicas de salud | 336.241 defunciones (50,0% mujeres) | | | Cuartiles. | |
| Privación socioeconómica. El índice considera desempleo, bajo nivel educacional, bajo nivel de educación en jóvenes, trabajadores manuales y trabajadores eventuales |  | | Mortalidad total y por causas específicas | Izco100 | 2013 | | Pamplona y Logroño | Pamplona: 15.305 personas fallecidas (51,8% mujeres)  Logroño: 10.262 personas fallecidas (50,4% mujeres) | | | Quintiles. | |
| Índice de privación (MEDEA): incluye% de trabajadores manuales,% de desempleo,% de trabajadores temporales,% de nivel educativo bajo, y% de nivel educativo bajo en población joven |  | | Mortalidad por todas las causas. | Rodriguez-Fonseca62 | 2013 | | Barcelona y  Madrid  (ciudades) | Barcelona: 3.936.250 personas (61,4% mujeres)  163.350 defunciones (54,1% mujeres)  Madrid: 6.801.499 personas (61,1% mujeres)  260.513 defunciones (53,0% mujeres) | | | Quintiles. | |
|  | **Esperanza de vida (n = 1)** | | |  |  | |  |  | | |  | |
| Privación socioeconómica. El índice considera desempleo, bajo nivel educacional, bajo nivel de educación en jóvenes, trabajadores manuales y trabajadores eventuales |  | |  | Izco100 | 2013 | | Pamplona y Logroño | Pamplona: 15.305 personas fallecidas (51,8% mujeres)  Logroño: 10.262 personas fallecidas (50,4% mujeres) | | | Quintiles. | |

ABVD: actividades básicas de la vida diaria; AD: actividades diarias; AIVD: actividades instrumentales de la vida diaria; CVRS: calidad de vida relacionada con la salud; EPOC: enfermedad pulmonar obstructiva crónica; ISCED: Clasificación International Normalizada de la Educación (acrónimo en inglés).
